# Supplementary material for: Hydrophilization of polysulfone membranes using a binary graft copolymer
Source: Royal Society of Chemistry journal article supplement (doi:10.1039/c4ta01481b), 2014-01-01
Supplement: c4ta01481b1.pdf [file c4ta01481b1.pdf]

## **Supporting Information for**

### **Hydrophilization of Polysulfone Membranes Using a Binary Graft Copolymer**

Yang Yang,<sup>1,2,3</sup> Lei Miao,<sup>1,2,3</sup> Jiwen Hu,<sup>\*,1,2,3</sup> Guojun Liu,<sup>\*,1,2,4</sup> Yuanyuan Tu,<sup>1,2</sup> Shudong Lin,<sup>1,2</sup>

Feng Liu,<sup>1,2</sup> Fei Li,<sup>1,2,3</sup> Yan Wu,<sup>1,2,3</sup> Ganwei Zhang,<sup>1,2</sup> and Hailiang Zou<sup>1,2</sup>

<sup>1</sup>*Guangzhou Institute of Chemistry, Chinese Academy of Sciences, Guangzhou, P. R. China,*

*510650; <sup>2</sup>Key Laboratory of Cellulose and Lignocellulosics Chemistry, Chinese Academy of*

*Sciences, P. R. China, 510650; <sup>3</sup> University of Chinese Academy of Science, Beijing, P.R. China,*

*100049; <sup>4</sup>Department of Chemistry, Queen's University, 90 Bader Lane, Kingston, Ontario, K7L*

*3N6, Canada*

---

\* Corresponding author, email: [hjw@gic.ac.cn](mailto:hjw@gic.ac.cn), fax: 86-20-85232307

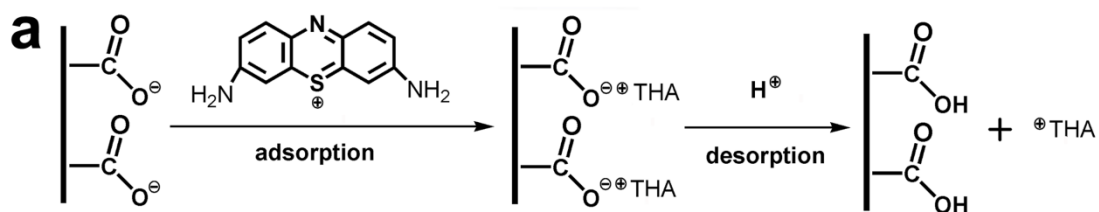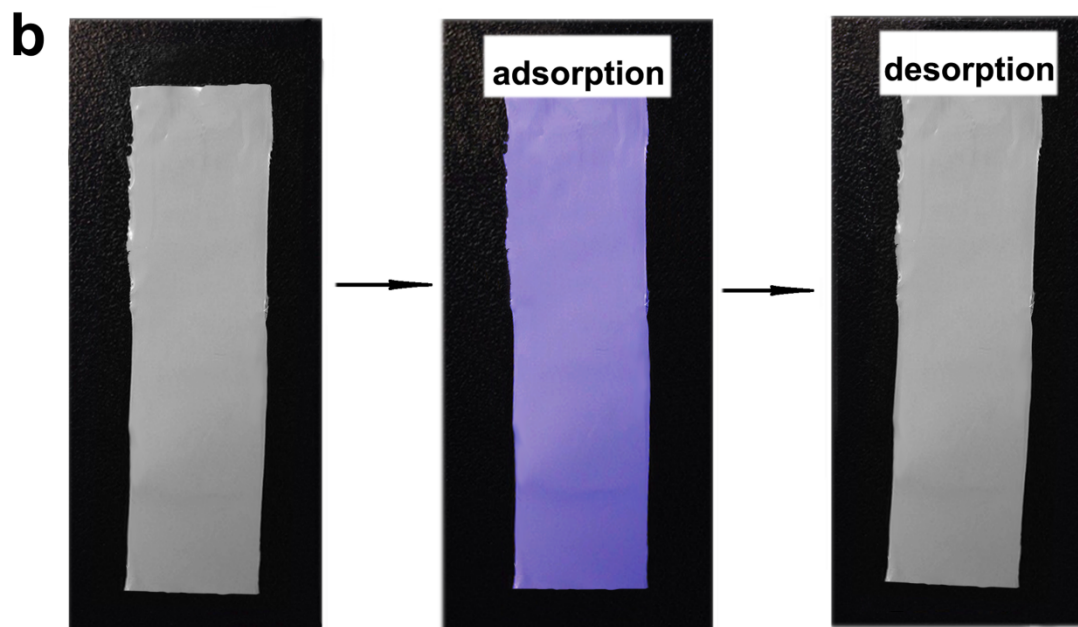

**Figure S1.** Proposed mechanism (a) and the photographs (b) of the thionine (THA) adsorption and desorption process onto and from the PSf membrane incorporating the amphiphilic graft copolymer.
